# Supplementary material for: Ladder-type nonacyclic indacenodithieno[3,2-b]indole for highly efficient organic field-effect transistors and organic photovoltaics
Source: Royal Society of Chemistry journal article supplement (doi:10.1039/c7tc02912h), 2017-01-01
Supplement: c7tc02912h1.pdf [file c7tc02912h1.pdf]

# Supporting Information

## **Ladder-Type Nonacyclic Indacenodithieno[3,2-b]indole for High Efficient Organic Field-Effect Transistors and Organic Photovoltaics**

Baomin Zhao,<sup>a</sup> Cenqi Yan,<sup>b</sup> Zheng Wang,<sup>a</sup> Hongyan Huang,<sup>a</sup> Yueming Hu,<sup>a</sup> Pei Cheng,<sup>b</sup> Mingdong Yi,<sup>a</sup> Chengting Huang,<sup>a</sup> Xiaowei Zhan,<sup>b,\*</sup> Wei Huang<sup>a,\*</sup>

<sup>a</sup> Key Laboratory for Organic Electronics and Information Displays & Institute of Advanced Materials (IAM), Jiangsu National Synergetic Innovation Center for Advanced Materials (SICAM), Nanjing University of Posts & Telecommunications, 9 Wenyuan Road, Nanjing 210023, China.

<sup>b</sup> Department of Materials Science and Engineering, College of Engineering, Peking University, Beijing 100871, China.

\*Email - iambmzhao@njupt.edu.cn; [iamwhuang@njupt.edu.cn](mailto:iamwhuang@njupt.edu.cn)

xwzhan@pku.edu.cn

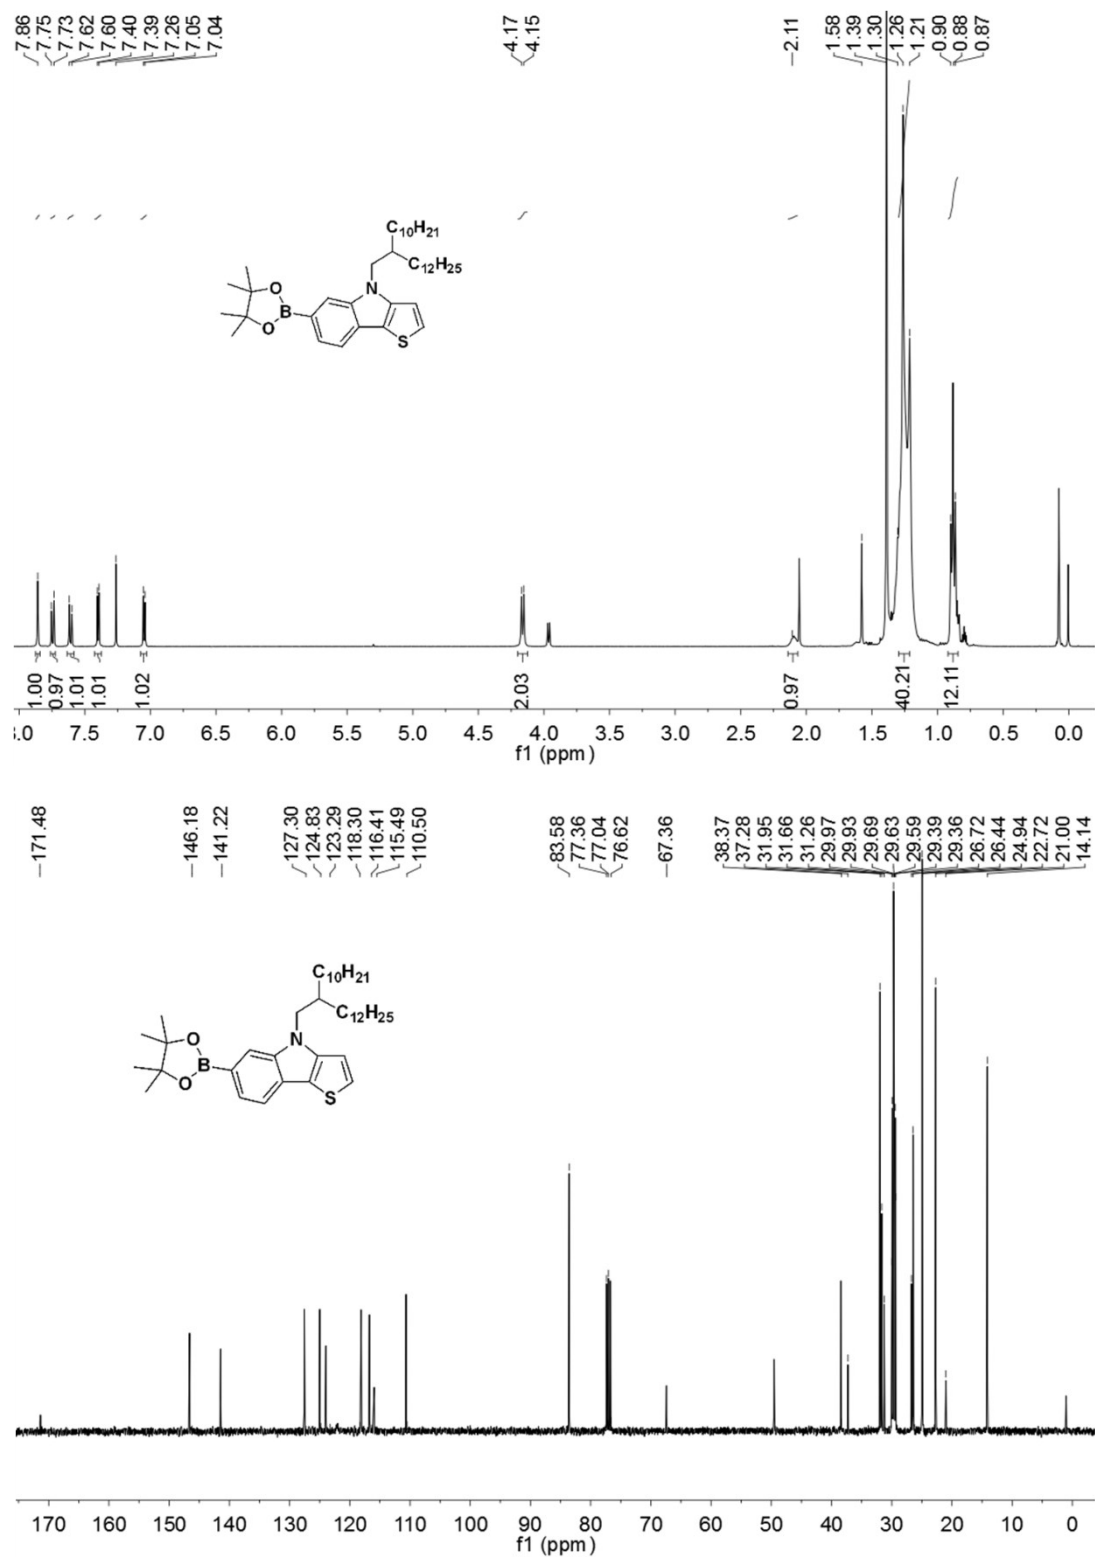

**Figure S1.** <sup>1</sup>H and <sup>13</sup>C NMR spectra of 4-(2-decyltetradecyl)-6-(4,4,5,5-tetramethyl-1,3,2-dioxaborolan-2-yl)-4H-thieno[3,2-b]indole (1)

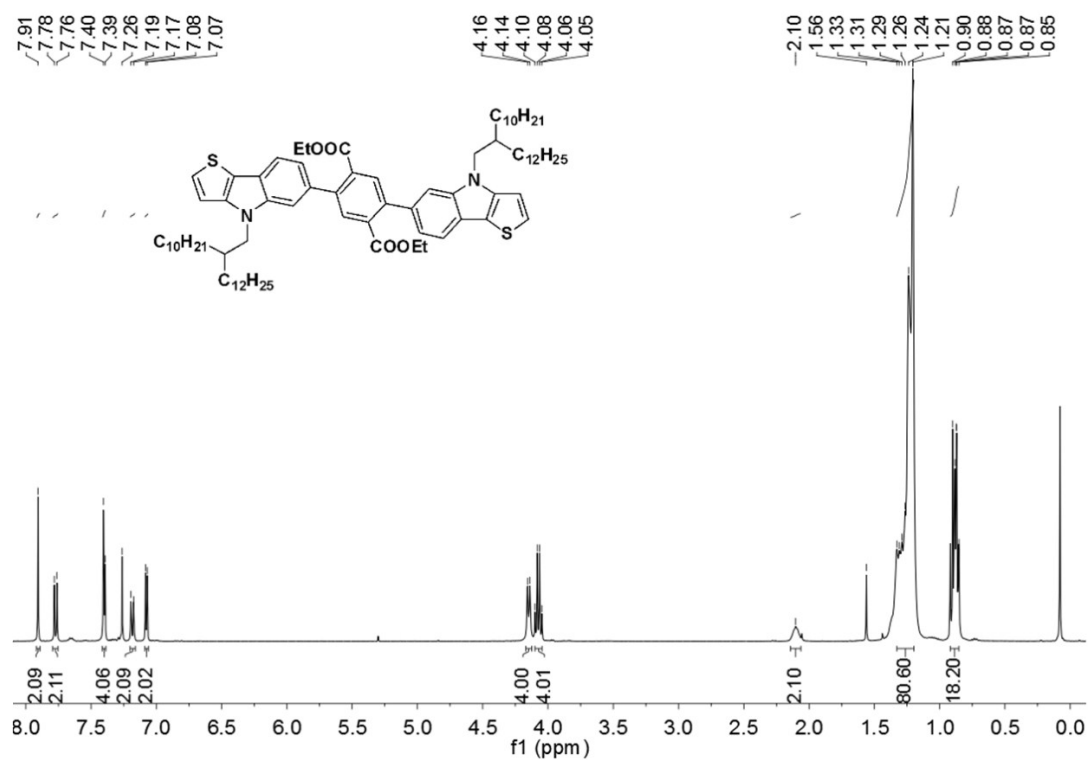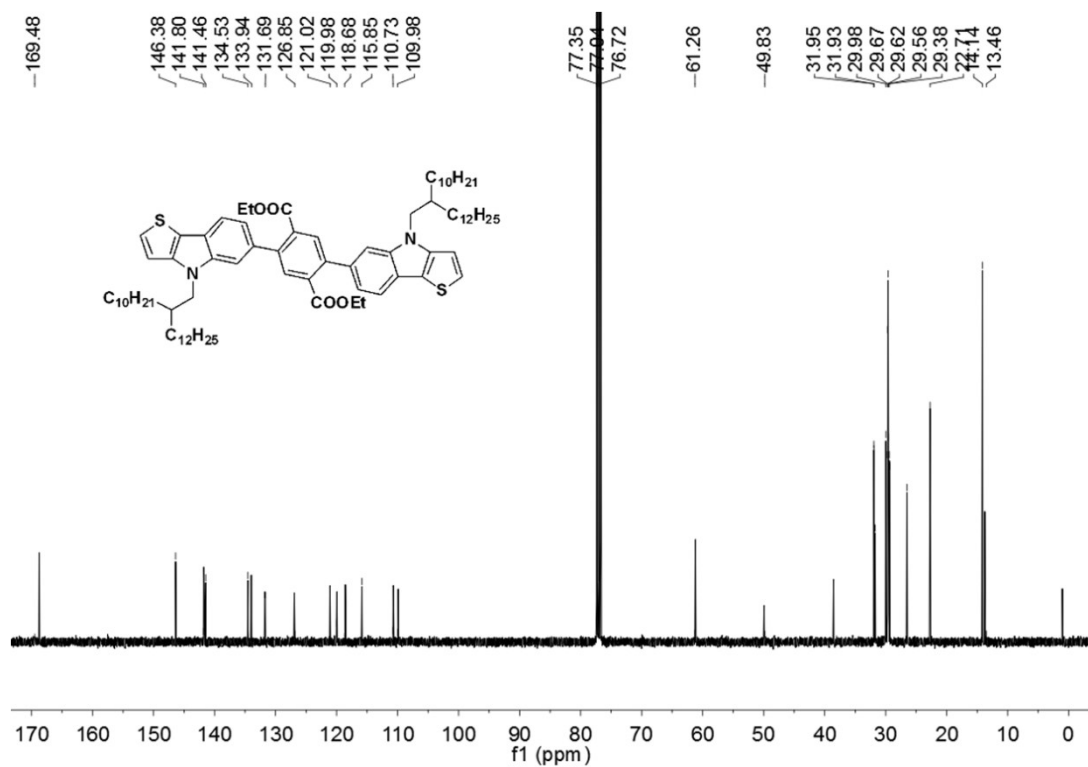

**Figure S2.** <sup>1</sup>H and <sup>13</sup>C NMR spectra of diethyl 2,5-bis(4-(2-decyltetradecyl)-4H-thieno[3,2-b]indol-6-yl)terephthalate (2)

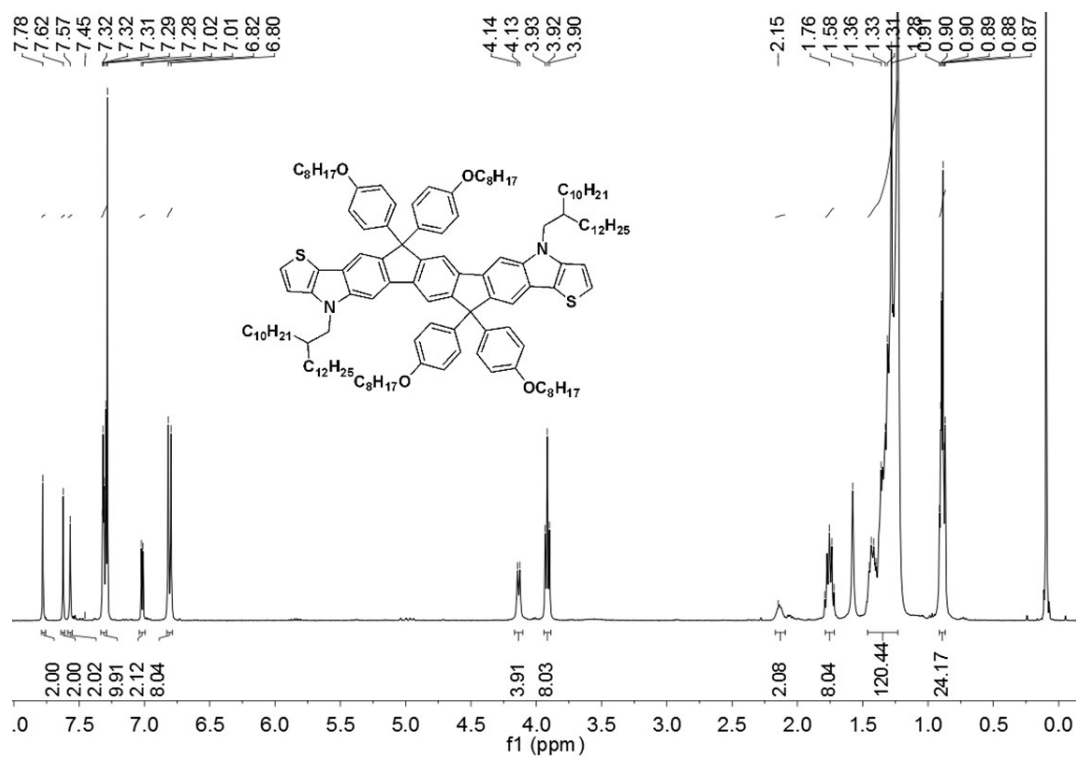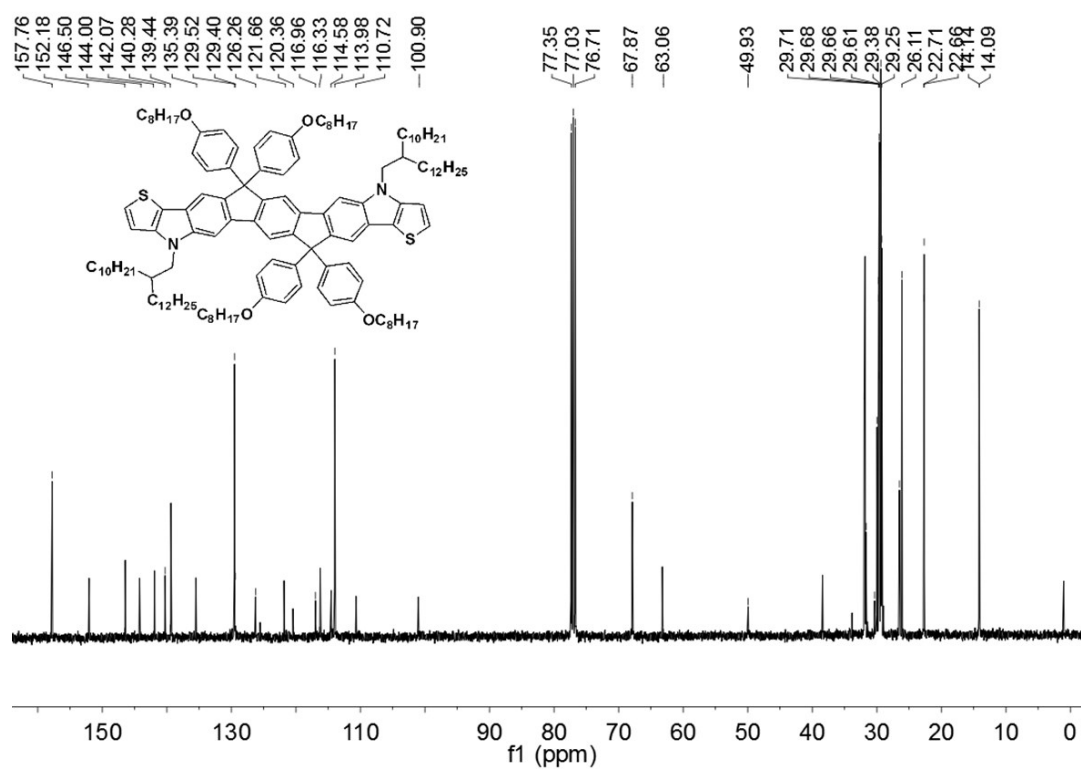

**Figure S3.**  $^1\text{H}$  and  $^{13}\text{C}$  NMR spectra of Monomer TIBDP

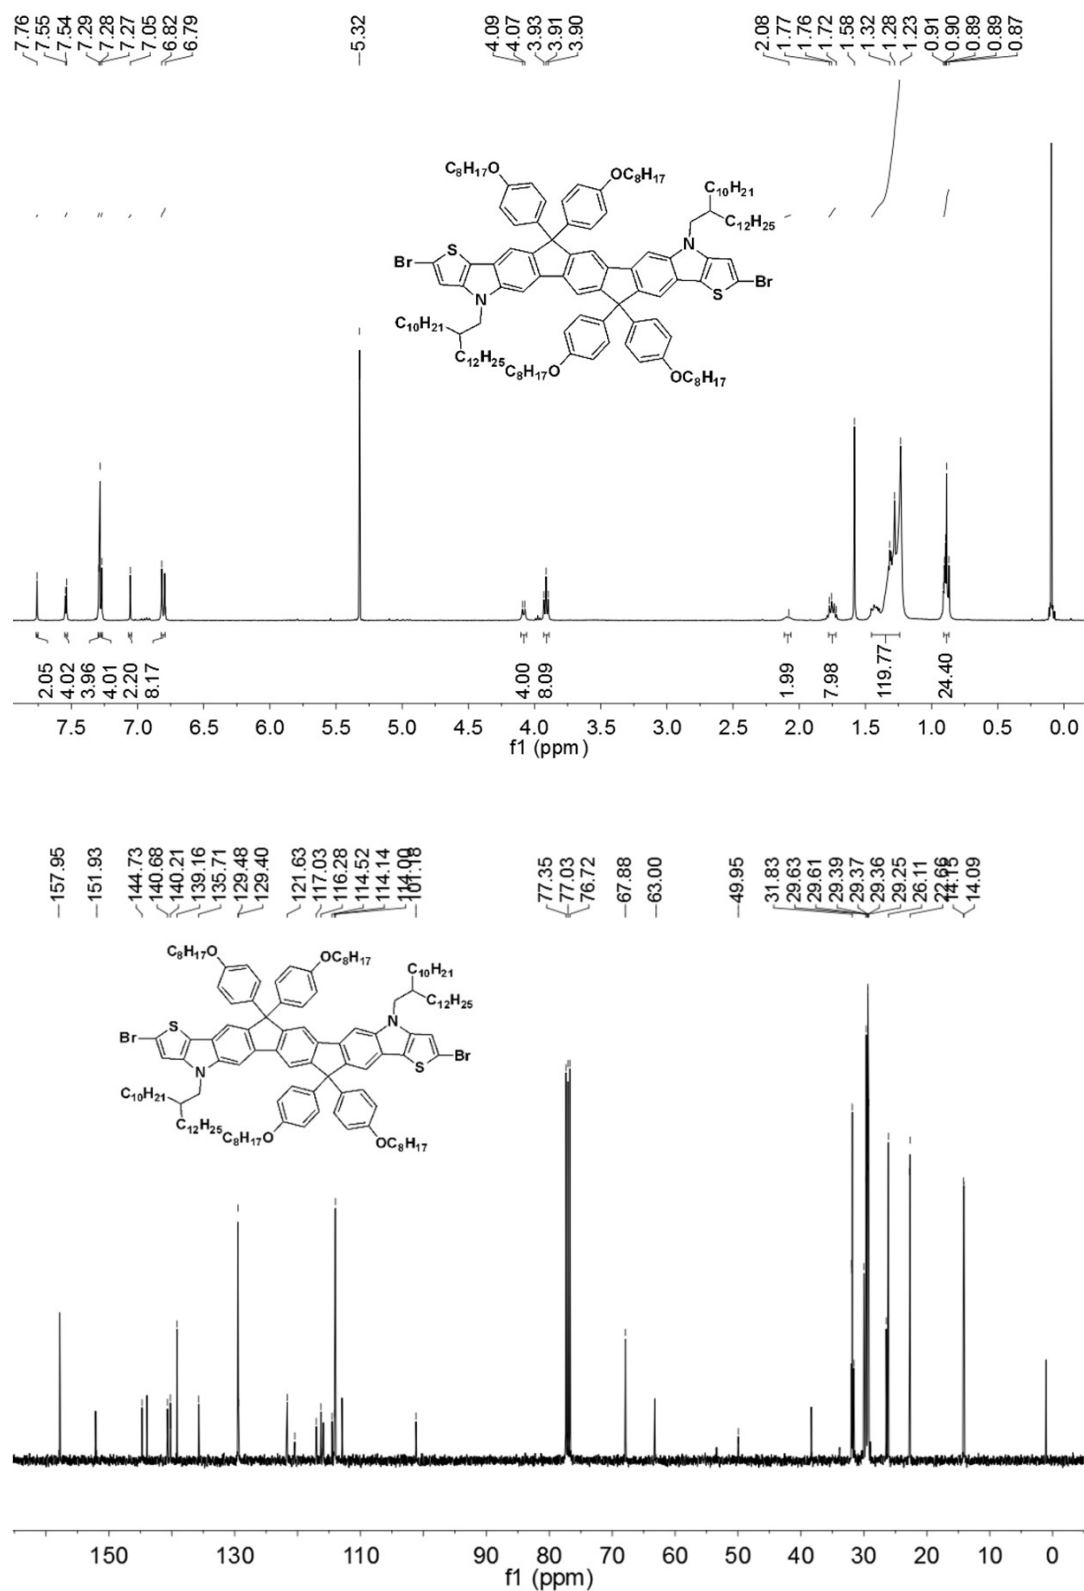

**Figure S4.** <sup>1</sup>H and <sup>13</sup>C NMR spectra of TIBDP-Br

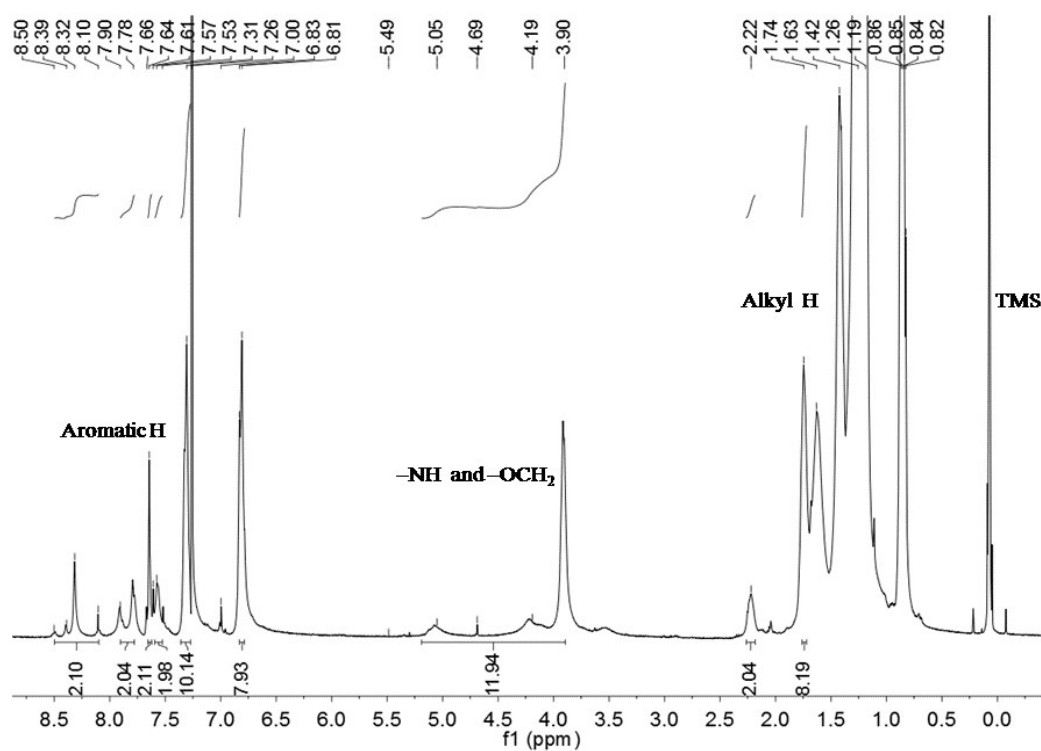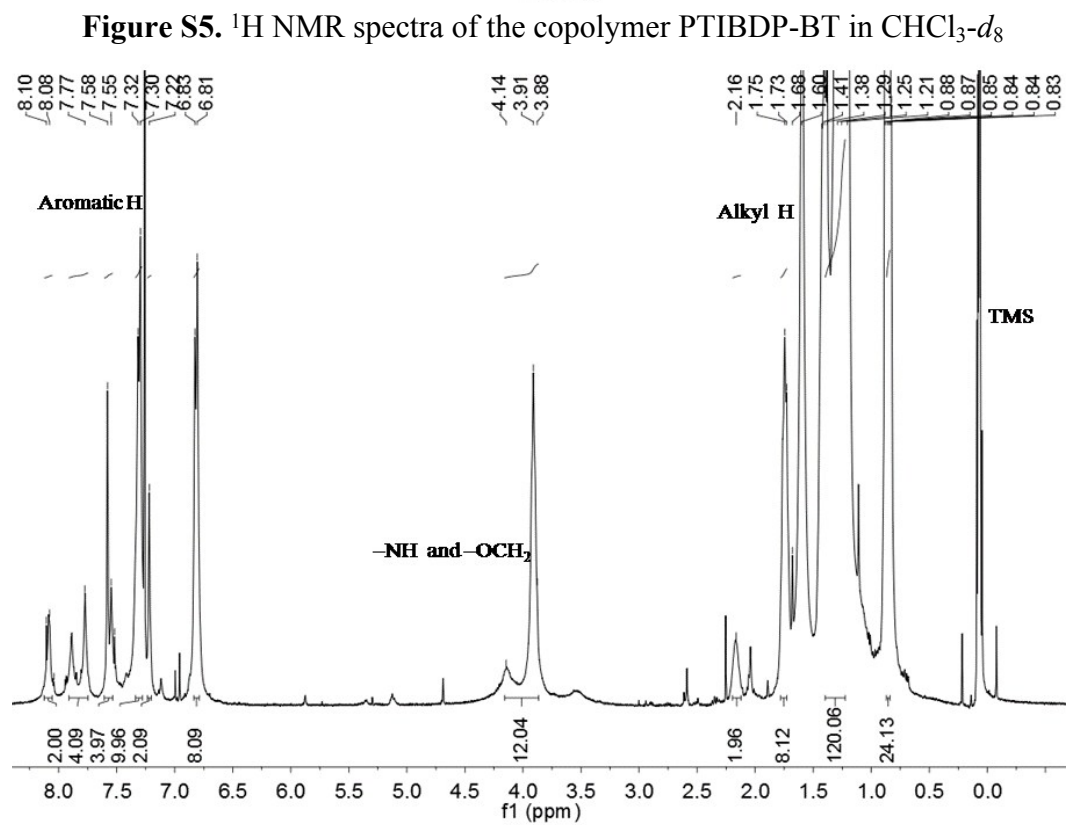

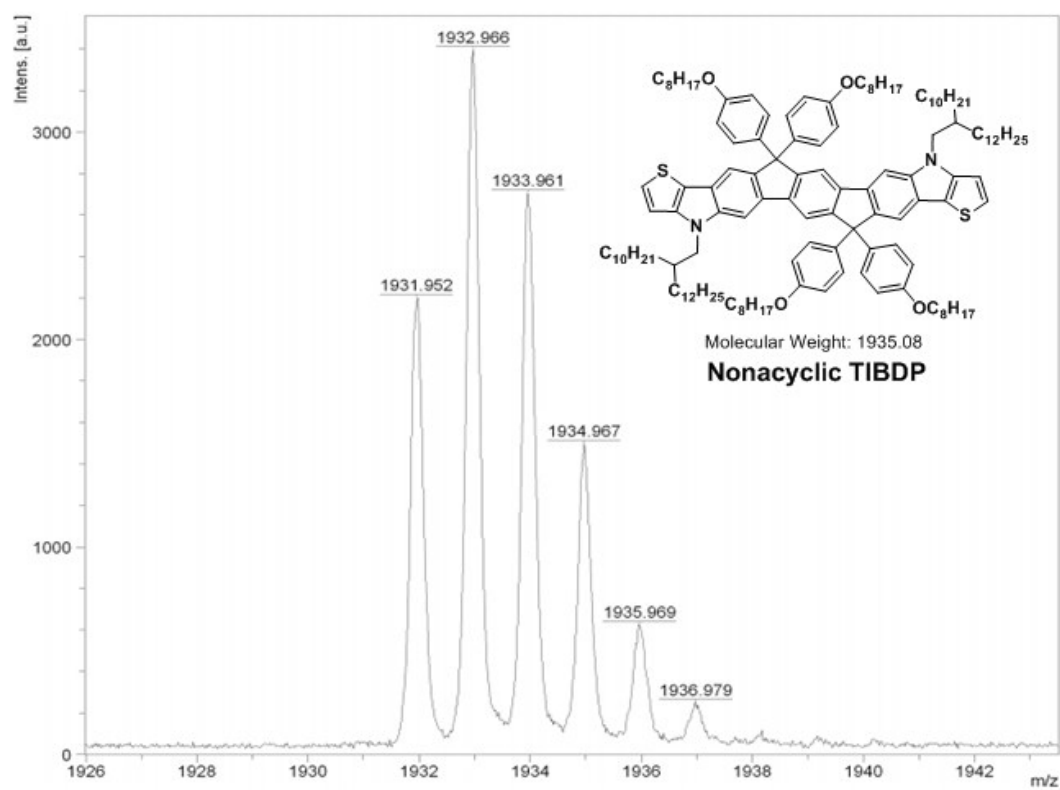

**Figure S7. MS spectrum of TIBDP**

### SCLC measurement

The SCLC mobility of the polymer:PC<sub>71</sub>BM blends were measured with the same device geometry as their PSC devices (ITO/PEDOT:PSS/Polymer:PC<sub>71</sub>BM/Ca/Al), whereas the active layer were PIDTI-BT:PC<sub>71</sub>BM (1:2, w/w) and PIDTI-DTBT:PC<sub>71</sub>BM (1:3, w/w) with thermal annealing at 130 °C for 10 min.

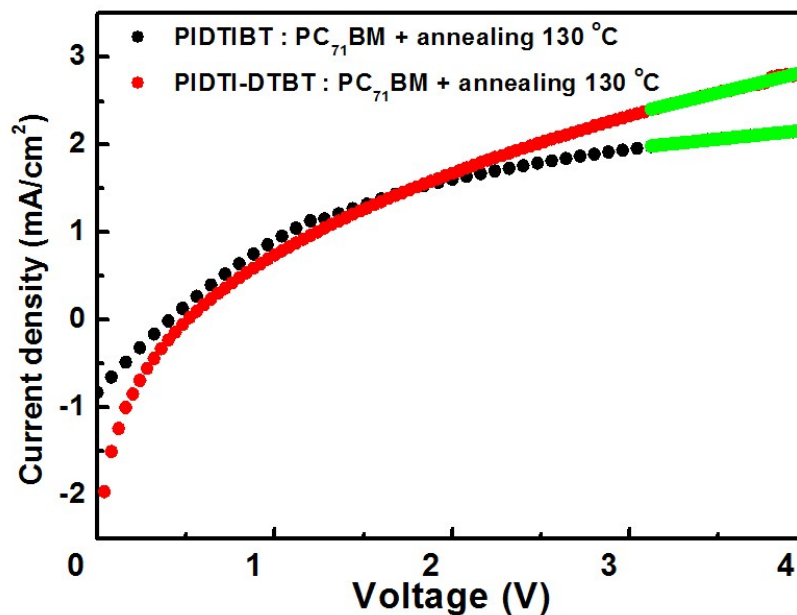

Figure S8. Hole mobility for blend films of PIDTI-BT:PC<sub>71</sub>BM (1:2, w/w) and PIDTI-DTBT:PC<sub>71</sub>BM (1:3, w/w) with the thermal annealing at 130 °C.
